# Supplementary material for: Polyaniline coating on carbon fiber fabrics for improved hexavalent chromium removal
Source: Royal Society of Chemistry journal article supplement (doi:10.1039/c4ra01700e), 2014-06-19
Supplement: c4ra01700e1.pdf [file c4ra01700e1.pdf]

# Supporting Materials For

## Polyaniline Coating on Carbon Fiber Fabric for Hexavalent Chromium Removal

Bin Qiu,<sup>1,2</sup> Cuixia Xu,<sup>1</sup> Dezhi Sun,<sup>2,\*</sup> Huige Wei,<sup>1</sup> Xi Zhang,<sup>1</sup> Jiang Guo,<sup>1</sup>

Qiang Wang,<sup>2</sup> Dan Rutman,<sup>1</sup> Zhanhu Guo<sup>1\*</sup> and Suying Wei<sup>1,3,\*</sup>

<sup>1</sup>Integrated Composites Laboratory (ICL)

Dan F Smith Department of Chemical Engineering

Lamar University, Beaumont, TX 77710 USA

<sup>2</sup>College of Environmental Science and Engineering

Beijing Forestry University, Beijing, 100083China

<sup>3</sup>Department of Chemistry and Biochemistry

Lamar University, Beaumont, TX 77710 USA

\* *Corresponding author*    [sundezhi@bjfu.edu.cn](mailto:sundezhi@bjfu.edu.cn)    phone (86)10 6233 6596

[suying.wei@lamar.edu](mailto:suying.wei@lamar.edu)    Phone (409) 880 7976

[zhanhu.guo@lamar.edu](mailto:zhanhu.guo@lamar.edu)    Phone (409) 880-7654

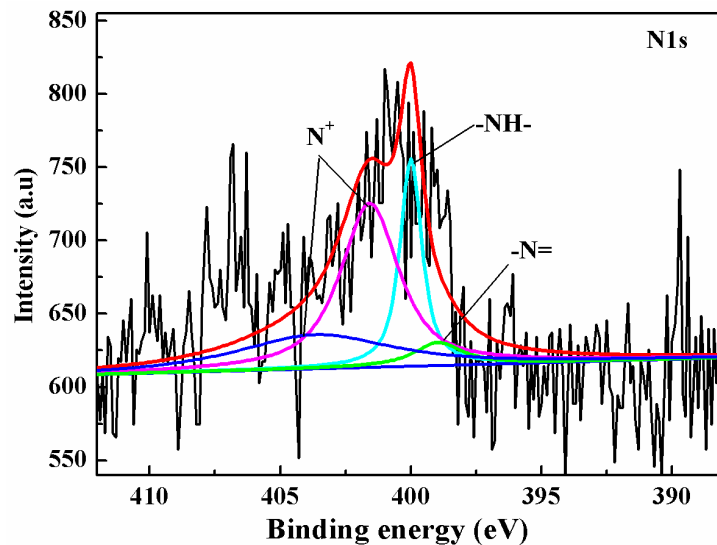

Fig. S1 XPS N1s spectra of synthesized PANI/CF with a 10.0 wt% PANI loading.

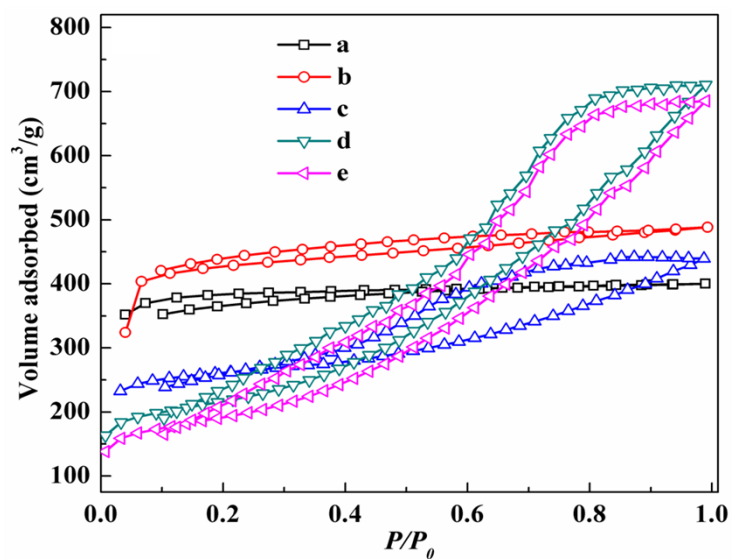

Fig. S2 nitrogen adsorption-desorption isotherm of (a) the as-received CFs, and PANI/CFs with a PANI loading of (b) 5.0, (c) 10.0, (d) 15.0, (e) 20.0 wt%.

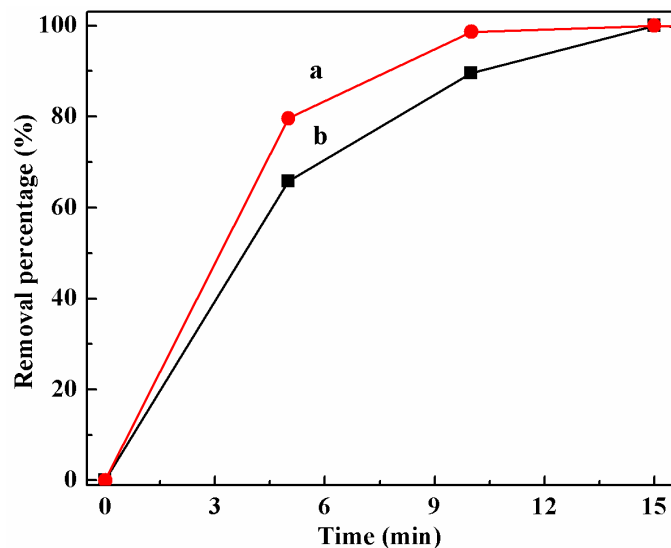

**Fig. S3** Effect of contact time on Cr(VI) removal efficiency by PANI/CF with a 10.0 wt% PANI loading, ([PANI/CF]: 2.75 g/L, [Cr(VI)]: (a) 1000 and (b) 600  $\mu\text{g/L}$ , pH: 1.0).

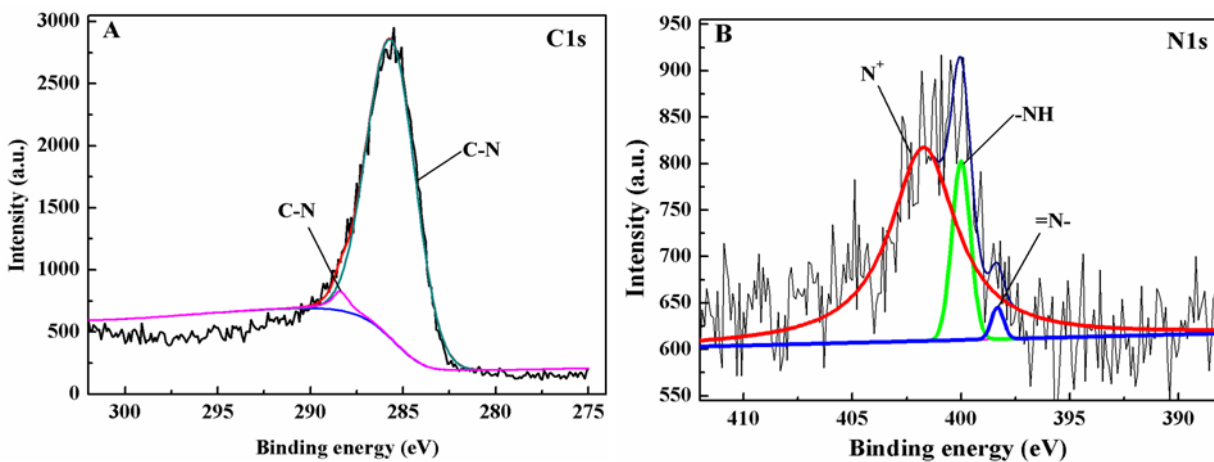

**Fig. S4** (A) XPS C1s and (B) N1s spectra of PANI/CF after adsorption of Cr(VI) solution with an initial Cr(VI) concentration of 48.0 mg/L and pH at 1.0.

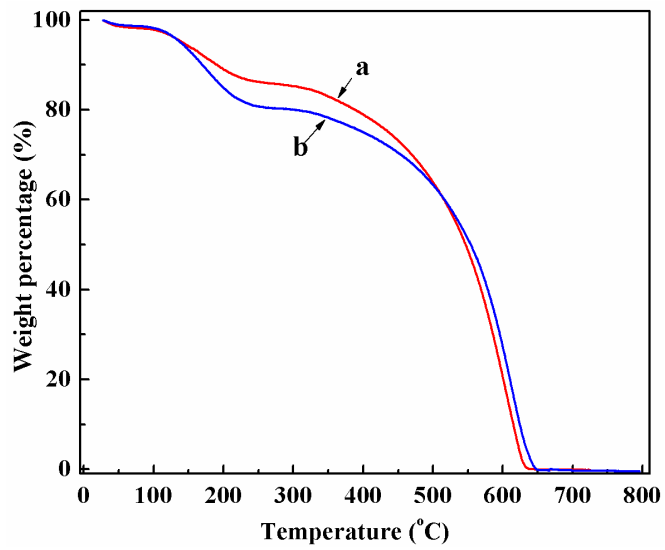

**Fig. S5** TGA curves of regenerated PANI/CF after five adsorption/desorption cycles.
